# Supplementary material for: Mediterranean Diet and Physical Activity Protect from Silent Brain Infarcts in a Cohort of Patients with Atrial Fibrillation
Source: PubMed Central journal article supplement — J Stroke. 2019 Sep 30;21(3):353–5. doi: 10.5853/jos.2019.01949 (PMC6780023; doi:10.5853/jos.2019.01949), 2019-09-30
Supplement: jos-2019-01949-suppl1.pdf [file jos-2019-01949-suppl1.pdf]

**Supplementary Table 1.** Baseline characteristics (n=443)

| Characteristic                                                                                | Value      |
|-----------------------------------------------------------------------------------------------|------------|
| Men                                                                                           | 255 (57.6) |
| Age (yr)                                                                                      | 65±8       |
| Hypertension                                                                                  | 227 (51.2) |
| Diabetes                                                                                      | 25 (5.6)   |
| Hyperlipidemia                                                                                | 168 (37.9) |
| Tobacco                                                                                       |            |
| Non-smoker                                                                                    | 371 (83.7) |
| Smoker                                                                                        | 60 (13.5)  |
| Ex                                                                                            | 12 (2.7)   |
| Alcohol (>78 g/wk)                                                                            | 108 (24.4) |
| Vascular disease (myocardial infarction, complex aortic plaque and peripheral artery disease) | 11 (2.5)   |
| Congestive heart failure                                                                      | 5 (1.1)    |
| Renal insufficiency                                                                           | 6 (1.4)    |
| Atrial fibrillation type                                                                      |            |
| Paroxysmal                                                                                    | 366 (83)   |
| Persistent                                                                                    | 27 (6.1)   |
| Permanent                                                                                     | 48 (10.9)  |
| Antiplatelet therapy                                                                          | 330 (74.5) |
| Antiarrhythmics                                                                               | 242 (54.6) |
| Mediterranean diet adherence                                                                  |            |
| Very low                                                                                      | 26 (5.9)   |
| Low                                                                                           | 119 (26.9) |
| Moderate                                                                                      | 258 (58.2) |
| High                                                                                          | 40 (9)     |
| Physical activity                                                                             |            |
| Low                                                                                           | 121 (27.3) |
| Moderate                                                                                      | 156 (35.2) |
| High                                                                                          | 166 (37.5) |
| Healthy profile                                                                               | 121 (27.3) |

Values are presented as number (%) or mean±standard deviation.
