# Supplementary material for: Mediterranean Diet and Physical Activity Protect from Silent Brain Infarcts in a Cohort of Patients with Atrial Fibrillation
Source: PubMed Central journal article supplement — J Stroke. 2019 Sep 30;21(3):353–5. doi: 10.5853/jos.2019.01949 (PMC6780023; doi:10.5853/jos.2019.01949), 2019-09-30
Supplement: jos-2019-01949-suppl2.pdf [file jos-2019-01949-suppl2.pdf]

**Supplementary Table 2.** Univariate analysis

| Variable                     | SBI (+) (n=66, 14.9%) | SBI (-) (n=377, 85.1%) | P      |
|------------------------------|-----------------------|------------------------|--------|
| Men                          | 40 (60.6)             | 215 (57.0)             | 0.588  |
| Age (yr)                     | 71±7                  | 65±8                   | <0.001 |
| Hypertension                 | 32 (48.5)             | 195 (51.7)             | 0.627  |
| Diabetes                     | 5 (7.6)               | 20 (5.3)               | 0.461  |
| Hyperlipidemia               | 28 (42.4)             | 140 (37.1)             | 0.414  |
| Tobacco                      |                       |                        | 0.416  |
| Non-smoker                   | 52 (78.8)             | 319 (84.6)             |        |
| Smoker                       | 11 (16.7)             | 49 (13.0)              |        |
| Ex                           | 3 (4.5)               | 9 (2.4)                |        |
| Alcohol (>78 g/wk)           | 24 (36.4)             | 84 (22.3)              | 0.014  |
| Vascular disease             | 2 (3)                 | 9 (2.4)                | 0.757  |
| Congestive heart failure     | 1 (1.5)               | 4 (1.1)                | 0.747  |
| Renal insufficiency          | 2 (3)                 | 4 (1.1)                | 0.202  |
| Chronic liver disease        | 0 (0)                 | 1 (0.3)                | 0.675  |
| Atrial fibrillation type     |                       |                        |        |
| Paroxysmal                   | 50 (75.8)             | 316 (83.8)             | 0.208  |
| Persistent                   | 5 (7.6)               | 22 (5.8)               |        |
| Permanent                    | 11 (16.7)             | 37 (9.8)               |        |
| Antiplatelet therapy         | 52 (78.8)             | 278 (73.7)             | 0.385  |
| Antiarrhythmics              | 34 (51.5)             | 208 (55.2)             | 0.582  |
| Statins                      | 27 (40.9)             | 113 (30)               | 0.078  |
| Mediterranean diet adherence |                       |                        | 0.614  |
| Very low                     | 3 (4.5)               | 23 (6.1)               |        |
| Low                          | 22 (33.3)             | 97 (25.7)              |        |
| Moderate                     | 36 (54.5)             | 222 (58.9)             |        |
| High                         | 5 (7.6)               | 35 (9.3)               |        |
| Physical activity            |                       |                        | 0.106  |
| Low                          | 25 (37.9)             | 96 (25.5)              |        |
| Moderate                     | 21 (31.8)             | 135 (35.8)             |        |
| High                         | 20 (30.3)             | 146 (38.7)             |        |
| Healthy profile              | 11 (16.6)             | 110 (30)               | 0.035  |

Values are presented as number (%) or mean±standard deviation.  
SBI, silent brain infarct.
