# Supplementary material for: Mediterranean Diet and Physical Activity Protect from Silent Brain Infarcts in a Cohort of Patients with Atrial Fibrillation
Source: PubMed Central journal article supplement — J Stroke. 2019 Sep 30;21(3):353–5. doi: 10.5853/jos.2019.01949 (PMC6780023; doi:10.5853/jos.2019.01949), 2019-09-30
Supplement: jos-2019-01949-suppl3.pdf [file jos-2019-01949-suppl3.pdf]

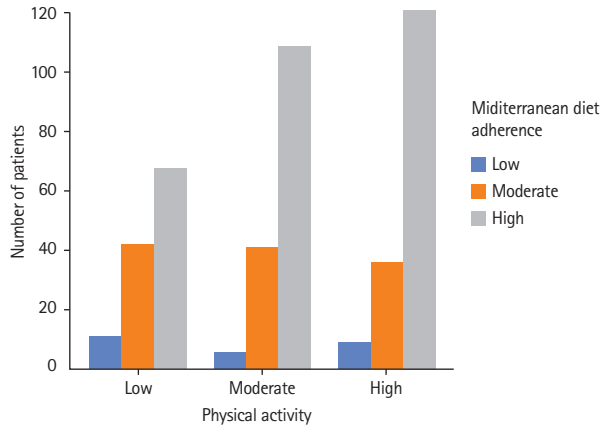

**Supplementary Figure 1.** Graphic showing distribution of patients regarding adherence to Mediterranean diet and physical activity.
